# Supplementary material
Source: PubMed Central journal article supplement (PMC1383687)
Supplement: bj3930285add.pdf [file bj3930285add.pdf]

**“Expression and Characterization of the Histidine-rich Protein, Hpn: Potential for Nickel Storage in *Helicobacter pylori*”**

Ruiguang GE, Rory M. WATT, Xuesong SUN, Julian A. TANNER, Qing-Yu HE, Jian-Dong HUANG, and Hongzhe SUN

**Supplementary Material**

**Figure S1 Analysis of purified recombinant Hpn protein by non-denaturing (native) polyacrylamide gel electrophoresis.**

**Figure S2 Titration curve for the reaction of Ni<sup>2+</sup> (as NiSO<sub>4</sub>) with apo-Hpn.** Increase in intensity at 286 nm is plotted against the ratio [Ni]/[Hpn] (*r*).

**Figure S3. Confirmation of deletion of the hpn gene in H. pylori 26695** by colony PCR, using primers specific for the *hpn* gene and upstream region on chromosome.

**Table S1 Comparison of Hpn biophysical properties with those of other histidine-rich proteins.**

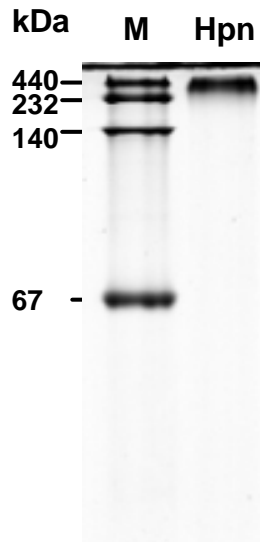

**Figure S1 Non-denaturing (native) 10% polyacrylamide gel of purified recombinant Hpn protein**, indicating the molecular size of the multimeric Hpn protein complex. M: native molecular weight protein markers; Hpn: Hpn protein.

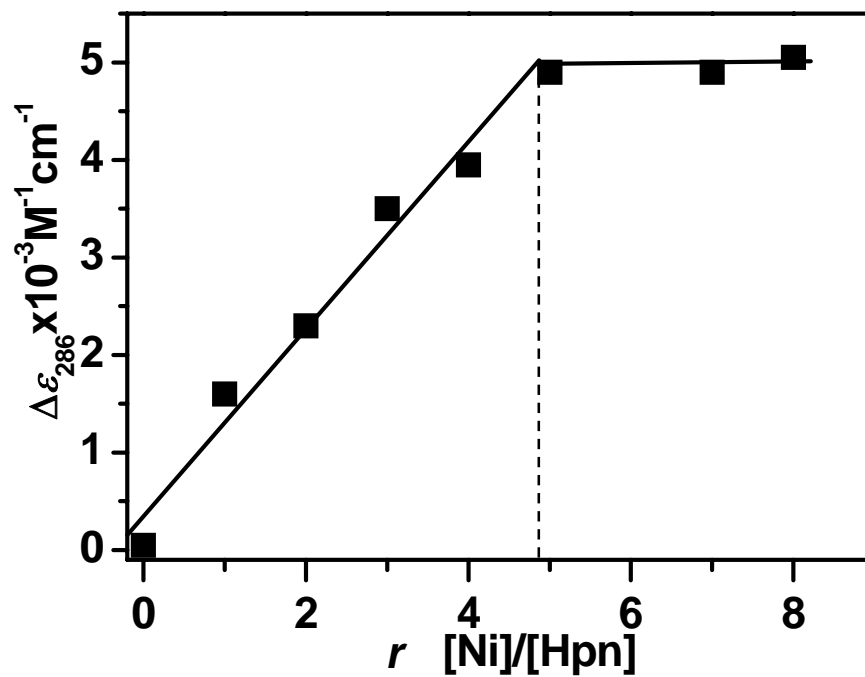

**Figure S2.** Titration curve for the reaction of  $\text{Ni}^{2+}$  (as  $\text{NiSO}_4$ ) with apo-Hpn. Increase in intensity at 286 nm is plotted against the ratio  $[\text{Ni}]/[\text{Hpn}]$  ( $r$ ).

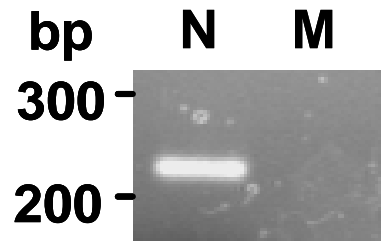

**Figure S3. Confirmation of deletion of the *hpn* gene in *H. pylori* 26695.** Colony PCR was performed on individual wild-type and *hpn*-deletion mutant clones. N: wild-type *H. pylori* 26695, M: *hpn*-deletion mutant.

**Table S1 Comparison of Hpn with other histidine-rich proteins<sup>a</sup>**

| Protein | Source                               | Predicted<br>molecular<br>mass | Apparent<br>molecular<br>mass <sup>b</sup> | Percentage of His<br>in protein | Ref.      |
|---------|--------------------------------------|--------------------------------|--------------------------------------------|---------------------------------|-----------|
|         |                                      | <i>kDa</i>                     | <i>kDa</i>                                 | %                               |           |
| CooJ    | <i>R. rubrum</i>                     | 12.5                           | 32.6, 39.0,<br>54.3                        | 16.5                            | (32)      |
| EP      | <i>M. edulis</i>                     | 28                             | 52.6                                       | 11.1                            | (42)      |
| HRC     | <i>Sarcoplasmic<br/>Reticulum</i>    | 165                            | ~1200                                      | 12.7                            | (43)      |
| IGPD    | <i>Filobasidiella<br/>neoformans</i> | 22                             | 549 <sup>c</sup>                           | 5.9                             | (37)      |
| UreE    | <i>K. aerogenes</i>                  | 17                             | 35                                         | 8.9                             | (44)      |
| UreE    | <i>P. mirabilis</i>                  | 17                             | 36                                         | 7.5                             | (45)      |
| HypB    | <i>B. japonicum</i>                  | 32                             | 78                                         | 7.9                             | (46)      |
| Hpn     | <i>H. pylori</i>                     | 7                              | >500, 55, 34,<br>26, 20, 14, 7             | 47                              | This work |

<sup>a</sup> All of the histidine rich proteins listed here are putatively multimeric.

<sup>b</sup> As determined by gel filtration chromatography, unless otherwise specified.

<sup>c</sup> Determined with analytical ultracentrifugation in the presence of one molar equivalent Mn<sup>2+</sup>.
